# Dismantling and rebuilding the trisulfide cofactor demonstrates its essential role in human sulfide quinone oxidoreductase

Aaron P. Landry<sup>1</sup>, Sojin Moon<sup>1</sup>, Jenner Bonanata<sup>2</sup>, Uhn Soo Cho<sup>1</sup>, E. Laura Coitiño<sup>2</sup> and Ruma Banerjee<sup>1\*</sup>

<sup>1</sup>Department of Biological Chemistry, University of Michigan Medical School, Ann Arbor, MI 48109 and

<sup>2</sup>Laboratorio de Química Teórica y Computacional (LQTC), Instituto de Química Biológica, Facultad de Ciencias and Centro de Investigaciones Biomédicas (CeInBio), Universidad de la República, Iguá 4225, Montevideo 11400, Uruguay

\*Address correspondence to: Ruma Banerjee, 4220C MSRB III, 1150 W. Medical Center Dr., University of Michigan, Ann Arbor, MI 48109-0600, Tel: (734) 615-5238; E-mail: rbanerje@umich.edu

## Abstract

Sulfide quinone oxidoreductase (SQR) catalyzes the first step in sulfide clearance, coupling H<sub>2</sub>S oxidation to coenzyme Q reduction. Recent structures of human SQR revealed a sulfur atom bridging the SQR active site cysteines in a trisulfide configuration. Here, we assessed the importance of this cofactor using kinetic, crystallographic and computational modeling approaches. Cyanolysis of SQR proceeds via formation of an intense charge transfer complex that subsequently decays to eliminate thiocyanate. Cyanolysis leads to reversible loss of SQR activity, which is restored in the presence of sulfide. We captured a crystallographic intermediate in SQR that provides clues as to how the oxidized state of the cysteines is preserved. Computational modeling and MD simulations revealed an ~10<sup>5</sup>-fold rate enhancement for nucleophilic addition of sulfide into the trisulfide versus a disulfide cofactor. The cysteine trisulfide in SQR is thus critical for activity and provides a significant catalytic advantage over a cysteine disulfide.

## Introduction

Hydrogen sulfide (H<sub>2</sub>S)<sup>1</sup> is a signaling molecule that exerts physiological effects in the cardiovascular, central nervous, and gastrointestinal systems (1-3). H<sub>2</sub>S is synthesized endogenously in mammals through the activities of cystathionine β-synthase (4) and cystathionine γ-lyase (5), as well as 3-mercaptopyruvate sulfur transferase (6,7). Tissue concentrations of H<sub>2</sub>S typically range from 10-80 nM (8-10). At higher concentrations, H<sub>2</sub>S can act as a respiratory poison that blocks the electron transport chain by inhibiting complex IV (11).

Due to the bimodal effects of H<sub>2</sub>S, its levels must be strictly regulated. The accumulation of toxic concentrations of H<sub>2</sub>S is prevented by its oxidation to thiosulfate and sulfate via the mitochondrial sulfide oxidation pathway (12). The first and committed step in this pathway is catalyzed by sulfide quinone oxidoreductase (SQR), an inner mitochondrial membrane-anchored flavoprotein, which is a member of the flavin disulfide reductase superfamily (13). SQR couples H<sub>2</sub>S oxidation to coenzyme Q<sub>10</sub> (CoQ<sub>10</sub>) reduction (12,14-16). It transfers the oxidized sulfane sulfur to a small molecule acceptor, which is predicted to be glutathione (GSH) under physiological conditions (15,16). Inherited deficiency of SQR presents as Leigh disease (17).

---

<sup>1</sup>Abbreviations used: H<sub>2</sub>S: hydrogen sulfide, CoQ<sub>10</sub> or CoQ<sub>1</sub>: coenzyme Q<sub>10</sub> or Q<sub>1</sub>, CT: charge transfer, SQR: sulfide quinone oxidoreductase, GSH: glutathione, DTT: dithiothreitol, DHLA: dihydrolipoic acid, HAR: heavy atom reorganization, MD: molecular dynamics, QM/MM: hybrid quantum mechanics/molecular mechanics electronic structure modeling DFT: density functional theory, PCM: polarized continuum model.

45 While the overall reaction catalyzed by SQRs are similar (18-20), the requirement of a small molecule  
46 acceptor by the human enzyme distinguishes it from bacterial homologs, which build long polysulfide  
47 chains and can release octasulfur rings as oxidation products (18-20). In contrast, the catalytic cycle of  
48 human SQR resembles that of bacterial flavocytochrome *c* sulfide dehydrogenase, which couples the  
49 conversion of sulfide to hydrodisulfide with the reduction of cytochrome *c* (21). Unexpectedly, the crystal  
50 structures of human SQR revealed the presence an additional sulfur bridging the active site cysteines in a  
51 trisulfide (22,23). The catalytic relevance of the trisulfide configuration is controversial, and it has been  
52 assigned as the inactive (22) or active (23) form of the enzyme. The presence of a cysteine trisulfide in SQR  
53 raises questions about how it is built in the active site. To our knowledge, a catalytically relevant cysteine  
54 trisulfide would be the first of its kind for a thiol-based redox active cofactor.

55 A reaction mechanism for human SQR that starts with the trisulfide as the resting form of the enzyme  
56 is shown in Fig. 1. The reaction cycle proceeds via two half reactions. In the first half reaction, sulfide adds  
57 to the trisulfide at the solvent-accessible Cys-379 to form a  $^{379}\text{Cys-SSH}$  persulfide. The bridging sulfur is  
58 retained on  $^{201}\text{Cys-SS}^-$  persulfide, which forms an unusually intense charge transfer (CT) complex with  
59 FAD that is centered at 695 nm (14,16,23,24). Sulfur transfer from  $^{379}\text{Cys-SSH}$  to small molecule acceptor  
60 leads to regeneration of the active site trisulfide with the concomitant two-electron reduction of FAD. In  
61 the second half reaction,  $\text{FADH}_2$  transfers electrons to  $\text{CoQ}_{10}$ , regenerating the resting enzyme and linking  
62 sulfide oxidation to mitochondrial energy metabolism by supplying reduced  $\text{CoQ}_{10}$  to Complex III in the  
63 electron transport chain (25).

64

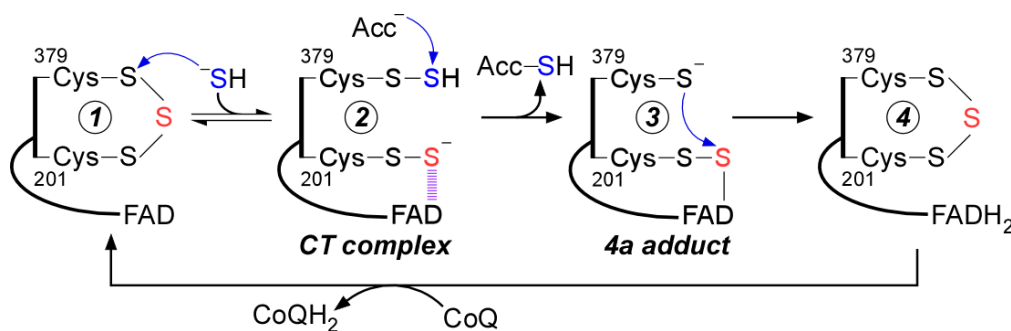

65

66

67 **Figure 1. Postulated mechanism for sulfide oxidation catalyzed by human SQR.** Proposed mechanism for the reaction  
68 catalyzed by SQR. Sulfide adds into the resting cysteine trisulfide (1) to generate a  $^{379}\text{Cys-SSH}$  persulfide and a  $^{201}\text{Cys-SS}^-$   
69 persulfide, with the latter participating in a CT complex with FAD (2). Sulfur transfer to a small molecule acceptor proceeds through  
70 a putative 4a adduct (3) to generate the reduced enzyme (4). Electron transfer from  $\text{FADH}_2$  to  $\text{CoQ}$  regenerates the resting enzyme.  
71 The oxidized sulfur and bridging sulfur in the cysteine trisulfide are labeled in blue and red, respectively.

72

73 In principle, an active site cysteine trisulfide provides several advantages over the conventional  
74 disulfide configuration seen in the mechanistically similar flavocytochrome *c* sulfide dehydrogenase (21).  
75 Sulfane sulfur species have increased electrophilic character versus their respective thiols (26), which  
76 would enhance the reactivity of the solvent-accessible  $\text{S}_\gamma$  of Cys-379 in SQR towards nucleophilic addition  
77 by sulfide. Indeed, the rate of sulfide addition to the cysteine trisulfide of SQR is estimated to be  $\sim 2 \times 10^7$ -  
78 fold higher than the rate of sulfide addition to cysteine disulfide in solution ( $0.6 \text{ M}^{-1}\text{s}^{-1}$  at pH 7.4, 25 °C)  
79 (27). The subsequent formation of persulfide rather than thiolate intermediate on Cys-201 would also  
80 enhance its reactivity for facilitating sulfur transfer and electron movement via the putative C4a adduct.

81 In this study, we report the spectral and kinetic characterization of cyanolysis-induced dismantling  
82 followed by sulfide-dependent rebuilding of the trisulfide cofactor. Cyanide treatment destabilized human  
83 SQR and led to its inactivation with concomitant loss of the bridging sulfane sulfur. Addition of sulfide to  
84 inactive cyanide treated enzyme led to recovery of active SQR, indicating that the oxidation state of the  
85 active site cysteines was preserved upon cyanide treatment. Crystallization of SQR with cyanide led to the  
86 capture of a  $^{379}\text{Cys N}-(^{201}\text{Cys-disulfanyl})\text{-methanimido thioate}$  intermediate, providing insights into how  
87 the trisulfide can be rebuilt following cyanide treatment. Finally, computational modeling indicated that the

88 trisulfide configuration provides a significant catalytic advantage over a disulfide in the SQR reaction.  
89 Collectively, our study demonstrates that the cysteine trisulfide in SQR is required for its catalytic activity,  
90 confers a catalytic edge over a disulfide, and contributes to its structural integrity.

91

## 92 **Results**

93

94 *Formation and decay of the cyanide-induced CT complex in SQR*—Mixing SQR with cyanide led to the  
95 formation of an intense CT complex characterized by an absorbance maximum at 695 nm and a shift in the  
96 FAD peak from 450 nm to 420 nm, with isosbestic points at 430 nm and 505 nm (Fig. 2A). These spectral  
97 features are similar to the CT complexes seen previously with other nucleophiles (24,28). From the  
98 dependence of the rate of CT complex formation on the concentration of cyanide, the following parameters  
99 were obtained:  $k_{\text{on}} = 10,500 \pm 118 \text{ M}^{-1} \text{ s}^{-1}$ ,  $k_{\text{off}} = 3.7 \pm 0.6 \text{ s}^{-1}$ , and  $K_{\text{D(app)}} = 348 \pm 52 \text{ } \mu\text{M}$  at 4 °C (Fig. 2B,C).  
100 The CT complex is an intermediate in the catalytic cycle of SQR, and sulfide addition to the CT  
101 intermediates formed by alternative nucleophiles leads to their decay with the concomitant reduction of  
102 FAD (24,28). Similarly, addition of sulfide immediately following cyanide-induced CT complex formation  
103 led to its decay with concurrent reduction of FAD (Fig. 2D). This result indicates that the CT complex  
104 formed in the presence of cyanide can participate in the first half reaction leading to FADH<sub>2</sub> formation.

105 *Decay of the cyanide-induced CT complex and cyanolysis of the cysteine trisulfide*—Extended  
106 incubation of the cyanide-induced CT complex in the presence of excess cyanide led to its slow decay (Fig.  
107 3A). A  $k_{\text{obs}}$  of  $0.15 \pm 0.02 \text{ min}^{-1}$  at 20 °C was observed for the decay of the CT complex in the presence of  
108 5-10 mM KCN (Fig. 3B). The FAD spectrum following CT decay was slightly altered from that in native  
109 SQR. Thus, a blue shift in the absorbance maximum from 450 nm to 447 nm and a narrowing of the 380  
110 nm absorption peak were seen (Fig. 3A). The altered spectral features were observed even after the enzyme  
111 was desalted to remove excess cyanide, suggesting a change in the flavin electronic environment.  
112 Cyanolysis yields ~1 mol of sulfane sulfur per mol SQR monomer (23), indicating that the native trisulfide  
113 state is lost upon prolonged cyanide treatment. To confirm this conclusion, we added sulfite, which forms  
114 a strong CT complex when added to native SQR (23). However, sulfite did not elicit spectral changes in  
115 cyanide pre-treated and desalted SQR (Fig. 3C).

116 *Sulfide-mediated regeneration of the active site trisulfide*—We next assessed the impact of cyanide  
117 treatment on SQR activity under steady state turnover conditions. Surprisingly, the specific activity of SQR  
118 in the standard assay was similar for the cyanide pre-treated ( $369 \pm 25 \text{ } \mu\text{mol min}^{-1} \text{ mg}^{-1}$ ) and native ( $360 \pm$   
119  $12 \text{ } \mu\text{mol min}^{-1} \text{ mg}^{-1}$ ) enzymes. This result suggested that cyanide treated enzyme could be reactivated by  
120 rebuilding the trisulfide following cyanolysis of SQR.

121 We therefore monitored the rate at which the trisulfide is rebuilt using as a measure of the active  
122 enzyme, formation of the sulfide-induced CT complex (14,24) (Fig. 4A). For this, the kinetics of CT  
123 complex formation was assessed following rapid mixing of sulfide with cyanide pre-treated SQR.  
124 Compared to native SQR ( $k_{\text{obs}} = 19.4 \pm 1.8 \text{ s}^{-1}$ ), CT complex formation was ~12-fold slower with cyanide  
125 pre-treated SQR ( $1.6 \pm 0.2 \text{ s}^{-1}$ ) (Fig. 4B). The lag in the absorbance increase at 675 nm indicated that  
126 trisulfide rebuilding limits the rate of CT complex formation in cyanide pre-treated SQR. Consistent with  
127 this postulate, incubation of cyanide pre-treated SQR with sulfide for 1 h at 4 °C led to FAD reduction (Fig.  
128 4C), signaling reformation of the active trisulfide-containing SQR under these conditions. The presence of  
129 excess sulfide, which serves as both the sulfur donor and acceptor, led to FADH<sub>2</sub> accumulation in the  
130 absence of CoQ<sub>1</sub> (14,24). The 447 nm FAD absorption peak observed in cyanide pre-treated SQR (Fig. 2A)  
131 shifted to 450 nm following incubation with sulfide (Fig. 4D), indicating recovery of the native FAD  
132 microenvironment. Furthermore, addition of sulfite to regenerated SQR resulted in the formation of a robust  
133 CT complex, confirming the presence of a trisulfide in the active site (Fig. 4D).

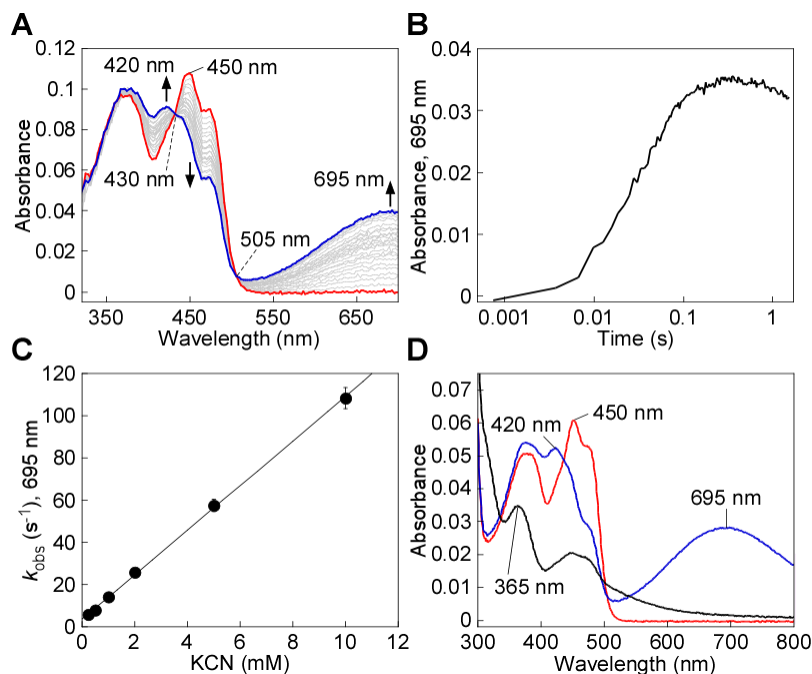

**Figure 2. Cyanide-induced CT complex formation in SQR.** **A**, SQR (10  $\mu$ M, red line) in 100 mM potassium phosphate, pH 7.4 containing 0.03% DHPC, was mixed 1:1 (v/v) with KCN (4 mM) and monitored over 1.5 s at 4  $^{\circ}$ C for the formation of the cyanide-induced CT complex at 695 nm (blue line). **B**, Representative stopped flow kinetic trace for the reaction in (A) monitored at 695 nm. **C**, Dependence of the  $k_{obs}$  at 4  $^{\circ}$ C for cyanide-induced CT complex formation on cyanide concentration. The data are representative of two independent experiments, with each data point obtained in triplicate. **D**, SQR (5  $\mu$ M, red line) was treated with KCN (5 mM) to form the CT complex (blue line), immediately followed by the addition of  $Na_2S$  (200  $\mu$ M) and incubated for 5 min at 20  $^{\circ}$ C, which led to CT complex decay and FAD reduction (black line). The data are representative of three independent experiments.

*Cyanolysis of the bridging sulfur decreases SQR protein stability*—We consistently observed that cyanide treatment led to an increased tendency for SQR to aggregate at temperatures above 20  $^{\circ}$ C, indicating that loss of the bridging sulfur in the active site trisulfide leads to protein instability. We therefore investigated the thermal stability of SQR with and without cyanide pre-treatment. Native SQR exhibited a  $T_{agg}$  of 64.8  $^{\circ}$ C, compared to 36.5  $^{\circ}$ C for cyanide pre-treated enzyme (Fig. 5). Incubation of cyanide pre-treated SQR in the presence of excess sulfide increased its stability ( $T_{agg}$  of 56.6  $^{\circ}$ C). Thus, the decrease in thermal stability of SQR upon loss of the bridging sulfur was largely reversed upon regeneration of the cysteine trisulfide.

*Dithiol-mediated reduction of FAD in SQR*—As an alternative to cyanolysis, we attempted to extract the bridging sulfur from the SQR trisulfide using DTT, which in principle could reduce the trisulfide to generate free thiols on Cys-379 and Cys-201. Unexpectedly, treatment with DTT led to bleaching of the yellow color associated with SQR (Fig. 6A). Given the known substrate promiscuity of SQR (24,28), we postulate that DTT adds to the resting trisulfide, forming a mixed disulfide and a CT complex. In the second step, an intramolecular displacement by the second thiol in the  $^{379}Cys-S-S-DTT$  adduct leads to elimination of oxidized DTT, reduction of FAD, and regeneration of the trisulfide (Fig. 6B).

To further test this model, the reaction of DTT with SQR was characterized by stopped-flow spectroscopy. Upon mixing SQR rapidly with DTT,  $FADH_2$  formation ( $k_{obs} = 0.36 \pm 0.04$  s $^{-1}$ ) was observed without accumulation of a CT complex intermediate (Fig. 6A). This contrasted with the reaction of other nucleophiles with SQR, and suggested that resolution of the mixed disulfide, via an intramolecular reaction,

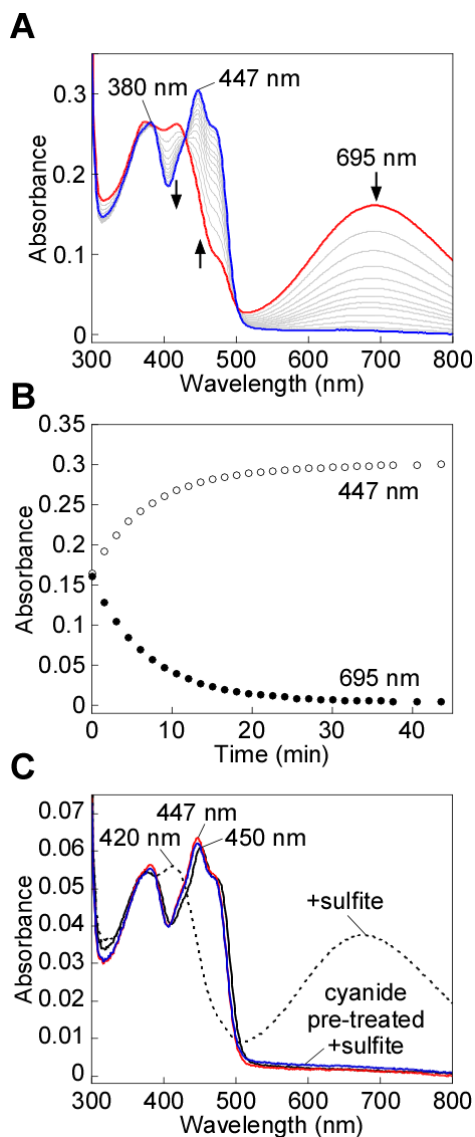

164  
165  
166 **Figure 3. Cyanide-induced CT complex decay in SQR.** A, SQR (25  $\mu$ M) in Buffer A was treated with KCN (10 mM) to form  
167 the CT complex (red line), which was monitored over 43 min at 20  $^{\circ}$ C for the complete decay of the CT complex (blue line). B,  
168 Kinetic traces for the decay of the cyanide-induced CT complex in (A), monitored at 450 nm (open circles) and 695 nm (closed  
169 circles). C, SQR (5  $\mu$ M, solid black line) was treated with sodium sulfite (5 mM) and incubated for 1 min at 20  $^{\circ}$ C to form the CT  
170 complex formation (dashed black line). In tandem, SQR (5  $\mu$ M) pre-treated with KCN (10 mM) and desalted (solid red line) was  
171 then treated with sodium sulfite (5 mM). CT complex formation was not observed after incubation for 1 min at 20  $^{\circ}$ C (solid blue  
172 line). The data are representative of three independent experiments.

173  
174 is more rapid than its formation (Fig. 6B). Next, we tested whether the intact cysteine trisulfide in SQR is  
175 required for FAD reduction by DTT. Pre-treatment of SQR with cyanide prevented FAD reduction by DTT  
176 (Fig. 6C).

177 In contrast to DTT, the monothiol,  $\beta$ -mercaptoethanol, was unable to drive FAD reduction, and formed  
178 a stable CT complex instead (Fig. 6C). Like DTT, the dithiol dihydrolipoic acid (DHLA), a physiological  
179 reductant, also led to FAD reduction, but only when the cysteine trisulfide was intact (Fig. 6D).

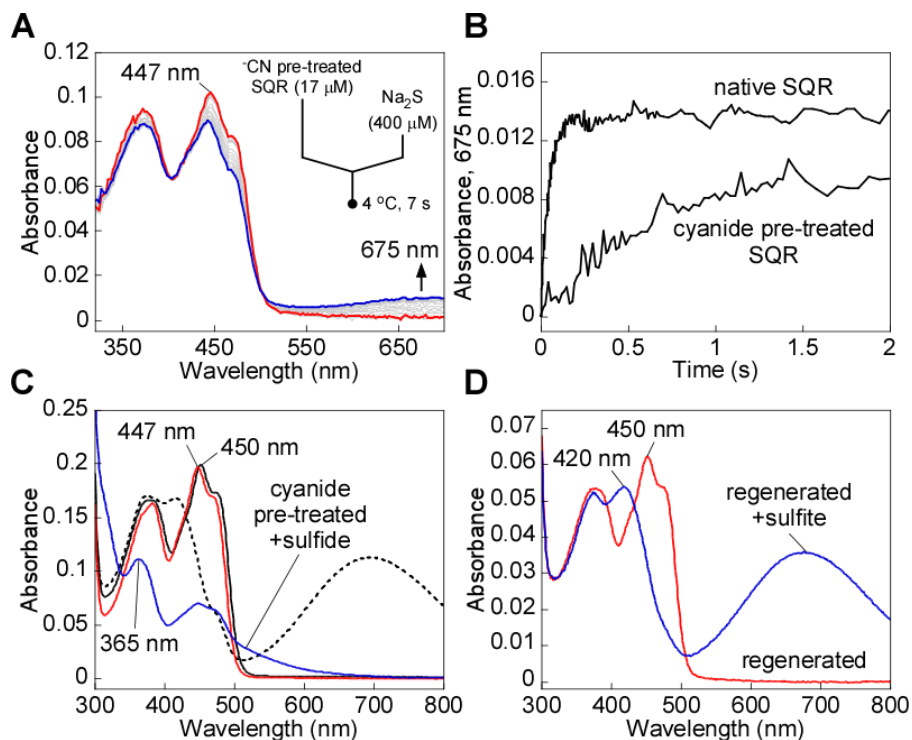

180  
181  
182  
183  
184  
185  
186  
187  
188  
189  
190  
191  
192

**Figure 4. Regeneration of cyanide pre-treated SQR by sulfide.** A, Cyanide pre-treated SQR (17  $\mu\text{M}$ , red line) in Buffer A was rapidly mixed 1:1 (v/v) with  $\text{Na}_2\text{S}$  (400  $\mu\text{M}$ ) and monitored over a period of 7 s at 4  $^\circ\text{C}$  for formation of the sulfide-induced CT complex (blue line). B, Comparison of the kinetic traces at 675 nm for cyanide pre-treated SQR, as shown in A, versus native SQR mixed with  $\text{Na}_2\text{S}$  (400  $\mu\text{M}$ ) under the same conditions. C, SQR (17  $\mu\text{M}$ , solid black line) in Buffer A was treated with KCN (10 mM) to form the CT complex (dashed black line) and monitored over 40 min at 20  $^\circ\text{C}$  for the complete decay of the CT complex and desalted to remove excess cyanide (red line). Cyanide pre-treated SQR was then incubated with  $\text{Na}_2\text{S}$  (300  $\mu\text{M}$ ) for 1 h at 4  $^\circ\text{C}$ , which led to FAD reduction (blue trace). D, Cyanide pre-treated SQR, pre-incubated with sulfide under the same conditions as (A) and desalted (5  $\mu\text{M}$ , red line), was treated with sulfite (5 mM) and incubated for 1 min to form the sulfite-induced CT complex (blue line). The data are representative of three independent experiments.

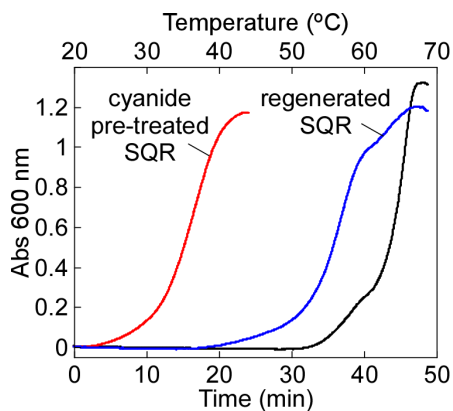

193  
194  
195  
196  
197  
198  
199

**Figure 5. Effect of bridging sulfur extraction on SQR protein stability.** SQR (20  $\mu\text{M}$ ) in Buffer A was pre-treated with KCN (10 mM) for 45 min at 20  $^\circ\text{C}$  and desalted, followed by incubation with  $\text{Na}_2\text{S}$  (300  $\mu\text{M}$ ) for 1 h at 4  $^\circ\text{C}$  and a second desalting. A final SQR concentration of 5  $\mu\text{M}$  was used for the thermal denaturation assays. The stability of native SQR (black line) versus cyanide pre-treated SQR before (red line) and after (blue line) incubation with sulfide was monitored by the increase in absorbance at 600 nm. The data are representative of three independent experiments.

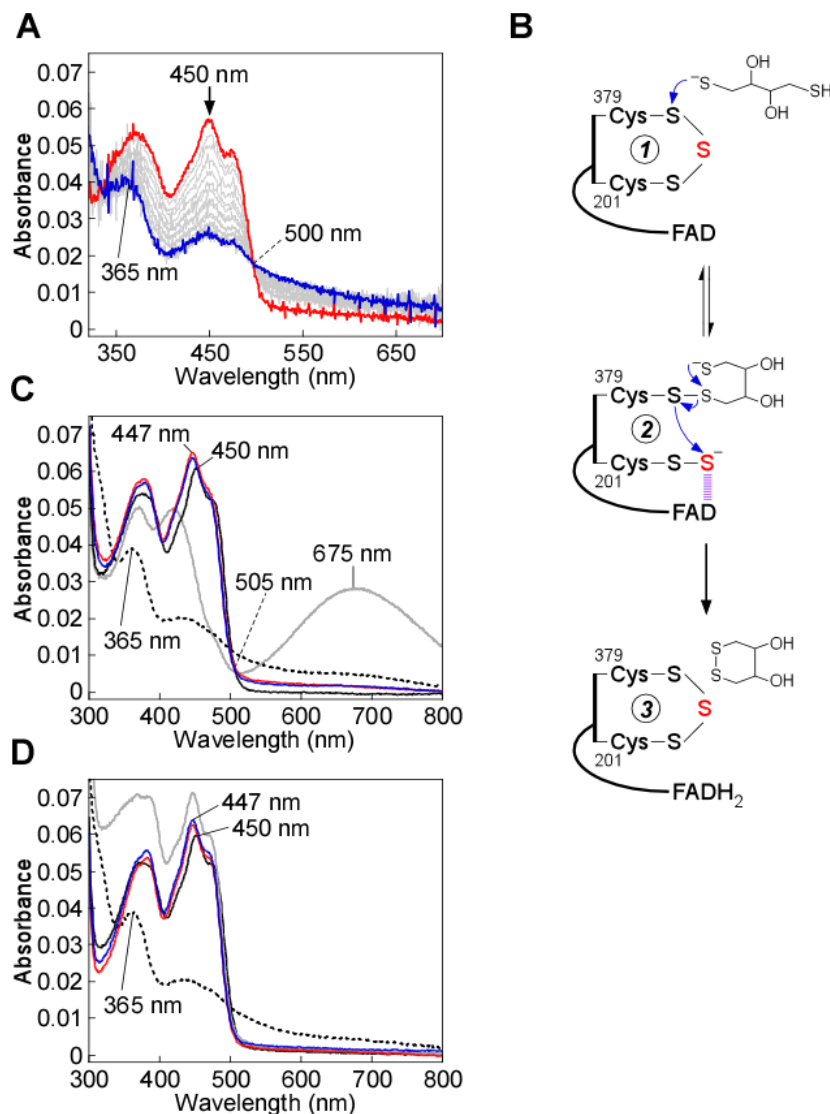

**Figure 6. Dithiol-mediated reduction of FAD in SQR.** **A**, SQR (10  $\mu\text{M}$ ) in Buffer A was rapidly mixed 1:1 (v/v) with DTT (400  $\mu\text{M}$ ) and FAD reduction was monitored over 7 s at 4  $^{\circ}\text{C}$ . **B**, Proposed mechanism for the addition of DTT into the SQR cysteine trisulfide, leading to FAD reduction. DTT adds into the cysteine trisulfide at the solvent-accessible Cys-379 to generate a mixed disulfide and  $^{201}\text{Cys-SS}^-$ . An intramolecular thiol-disulfide exchange then regenerates the SQR cysteine trisulfide, with electrons moving into FAD. **C**, SQR (5  $\mu\text{M}$ ) in Buffer A (solid black line), was treated with DTT (200  $\mu\text{M}$ ), leading to FAD reduction (dashed black line), or  $\beta$ -mercaptoethanol (200  $\mu\text{M}$ ), leading to stable CT complex formation (solid gray line). FAD reduction was not observed in cyanide pre-treated SQR (5  $\mu\text{M}$ , solid red line) upon treatment with DTT (200  $\mu\text{M}$ , solid blue line). **D**, SQR (5  $\mu\text{M}$ ) under the same conditions as in (C) (solid black line), was treated with DHLA (200  $\mu\text{M}$ ), leading to FAD reduction (dashed black line), followed by re-oxidation by addition of  $\text{CoQ}_1$  (180  $\mu\text{M}$ , solid gray line). FAD reduction was not observed in cyanide pre-treated SQR (5  $\mu\text{M}$ , solid red line) upon treatment with DHLA (200  $\mu\text{M}$ , solid blue line). The data are representative of three independent experiments.

*Structure of SQR-CoQ<sub>1</sub> soaked with cyanide*—To obtain structural insights into the interaction of cyanide with SQR, crystals of human SQR-CoQ<sub>1</sub> were soaked with cyanide. The 2.25  $\text{\AA}$  resolution structure was obtained by molecular replacement using coordinates for the SQR-CoQ<sub>1</sub> structure (PDB ID: 6OIB) (Table 1). The overall structure (Fig. 7A) is similar to that reported previously for SQR-CoQ<sub>1</sub> (23).

221 **Table 1. Crystallographic data collection and refinement statistics\***  
 222

|                                          | <b>SQR-CoQ<sub>1</sub> with cyanide</b>                           |
|------------------------------------------|-------------------------------------------------------------------|
| Space group                              | P2 <sub>1</sub> 2 <sub>1</sub> 2 <sub>1</sub>                     |
| Unit cell parameters (Å)                 | a=78.39<br>b=111.75<br>c=134.05<br>$\alpha=\beta=\gamma=90^\circ$ |
| Wavelength (Å)                           | 1.12723                                                           |
| <b><u>Data collection statistics</u></b> |                                                                   |
| Resolution range (Å)                     | 50.00-2.25 (2.29-2.25)                                            |
| Number of unique reflections             | 57050 (2696)                                                      |
| Completeness (%)                         | 99.7 (96.0)                                                       |
| R <sub>merge</sub>                       | 0.175 (0.974)                                                     |
| R <sub>pim</sub>                         | 0.059 (0.359)                                                     |
| Redundancy                               | 8.6 (6.6)                                                         |
| Mean I/σ                                 | 14.0 (2.3)                                                        |
| <b><u>Refinement statistics</u></b>      |                                                                   |
| Resolution range (Å)                     | 39.20-2.24                                                        |
| R <sub>work</sub> /R <sub>free</sub> (%) | 17.24/21.60                                                       |
| RMSD bonds (Å)                           | 0.008                                                             |
| RMSD angles (deg)                        | 0.922                                                             |
| Average B factor (Å <sup>2</sup> )       | 36.62                                                             |
| Number of water molecules                | 125                                                               |
| Ramachandran                             |                                                                   |
| favored (%)                              | 96.51                                                             |
| allowed (%)                              | 3.49                                                              |
| not allowed (%)                          | 0                                                                 |

\*Values in parentheses are for highest-resolution shell.

223  
 224 Surprisingly, strong and continuous electron density was observed between Cys-201 and Cys-379 (Fig.  
 225 7B,C). The electron density in the presence of cyanide was more extended than for the trisulfide in the  
 226 native SQR-CoQ<sub>1</sub> + sulfide structure (Fig. 7D). We interpret the additional electron density as evidence for  
 227 the insertion of a cyanide molecule in the trisulfide bridge, forming an *N*-(<sup>201</sup>Cys-disulfanyl)-methanimido  
 228 thioate intermediate, <sup>201</sup>Cys-S-S-N=CH-S-<sup>379</sup>Cys. The relevance of this species to the spectral intermediates  
 229 observed in the presence of cyanide is discussed later.

230 *MD simulations and QM/MM reactivity predictors for a disulfide versus trisulfide cofactor*—Direct  
 231 comparison of the active site architecture in representative SQR structures was extracted from 600 ns  
 232 trajectories (RMSDs shown in Fig. S1). The simulations provided insights into the structural and dynamical  
 233 differences between the trisulfide versus a modeled disulfide state, and a chemical rationale for the use of  
 234 the trisulfide cofactor by SQR. In the disulfide structure (Fig. 8A, *right*) the sulfur atoms of Cys-201 and  
 235 Cys-379 are buried (Fig. S2, *right*), and not in contact with solvent molecules. The S<sub>γ</sub> atoms in the two  
 236 cysteines exhibit differences in their distance to the C4a in FAD, with Cys-379 being closer (Fig. 8B, *right*)  
 237 at distances of 3.4 Å versus 3.9 Å for Cys-201 in the representative structure. These data argue against a  
 238 catalytic disulfide configuration in SQR, which is reinforced by considerations of the intrinsic  
 239 electrophilicity of the sulfur atoms calculated at the QM/MM level.



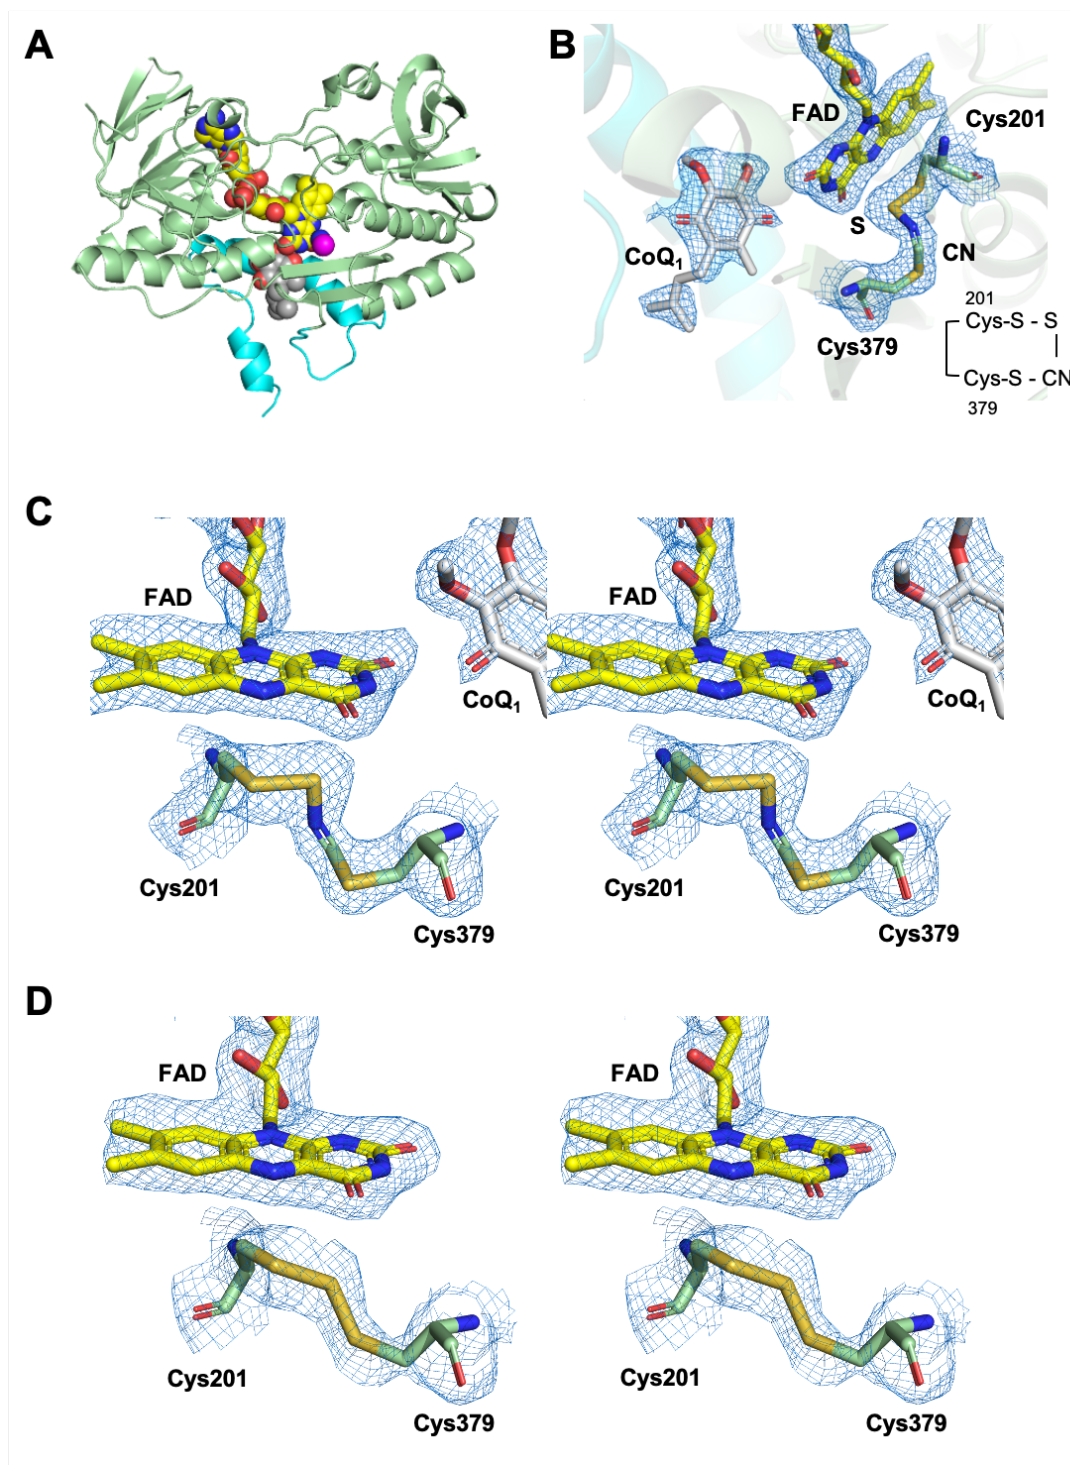

240  
241  
242  
243  
244  
245  
246  
247

**Figure 7. Structure and active site of SQR-CoQ<sub>1</sub> + cyanide.** **A**, The overall structure of SQR-CoQ<sub>1</sub> + cyanide is shown with FAD, CoQ<sub>1</sub>, and cyanide in yellow, grey, and magenta spheres, respectively. The C-terminal membrane-anchoring helices are highlighted in cyan. **B**, Electron density maps ( $2F_o - F_c$ ) of the active site shown in mesh contoured at  $1.0 \sigma$ . Cys-201, Cys-379, FAD, CoQ<sub>1</sub>, sulfur derived from the trisulfide, and cyanide are shown in stick display. **C**, Stereo image of the active site of SQR-CoQ<sub>1</sub> treated with cyanide. The electron densities ( $2F_o - F_c$ ) are contoured at  $1.0 \sigma$ . **D**, Stereo image of the active site in SQR-CoQ<sub>1</sub> treated with sulfide (PDB ID: 6OI6) showing the resting trisulfide. Chain A is shown in this figure.

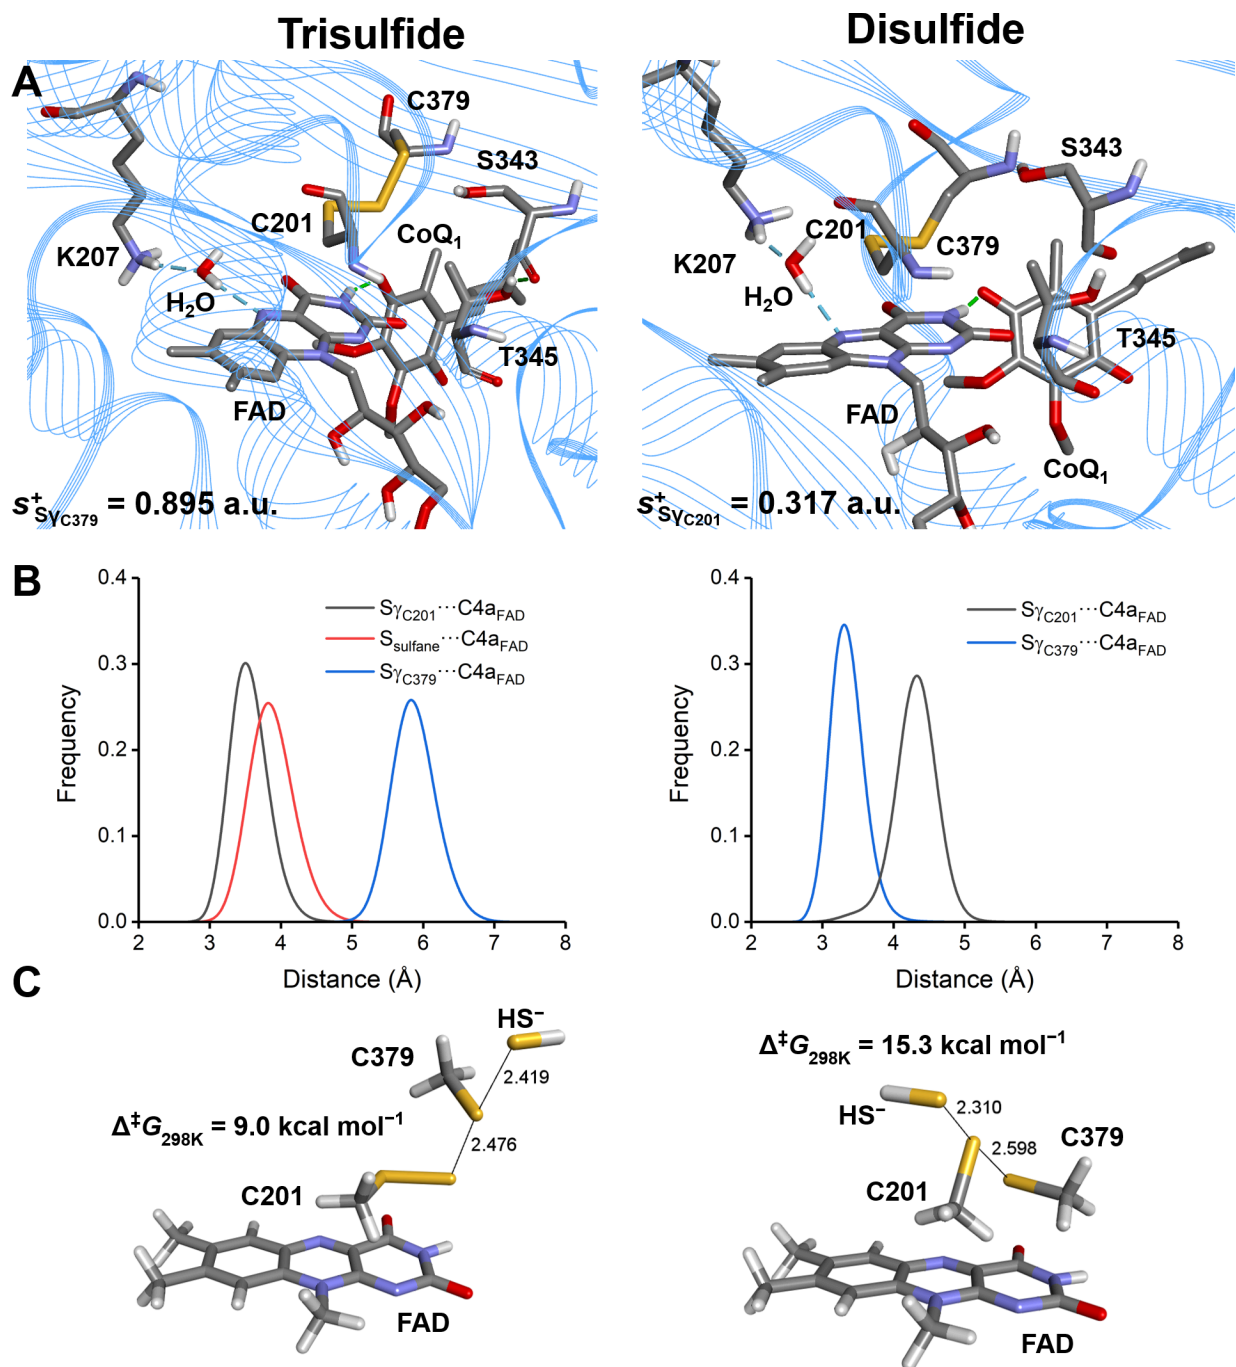

248  
249  
250  
251  
252  
253  
254  
255  
256  
257  
258  
259  
260

**Figure 8. MD simulations and computational modeling of SQR.** A, Active site architecture in representative structures corresponding to the most populated cluster from 600 ns MD simulations of SQR in the trisulfide (left) or disulfide (right) state. Condensed local softness for the most electrophilic  $S\gamma$  atom between Cys-201 and Cys-379 is reported for each system in atomic units (a.u.). B, Sulfur-to-C4a FAD distances for  $S\gamma_{C201}-C4a_{FAD}/S_{sulfane}-C4a_{FAD}/S\gamma_{C379}-C4a_{FAD}$  (trisulfide, left) and  $S\gamma_{C201}-C4a_{FAD}/S\gamma_{C379}-C4a_{FAD}$  (disulfide, right) monitored along the corresponding MD trajectories. C, Structure of the transition states (TS) located for the sulfide anion attack on the trisulfide (left) or disulfide (right) using a reduced model of the active site of SQR at the IEFPCM-DFT level of theory in a dielectric of  $\epsilon = 10.125$ . Data correspond to interatomic distances in Å and Gibbs free-energy associated barriers at 298 K in kcal mol<sup>-1</sup>.

261 In the trisulfide model, the  $S_{\gamma}$  atom of Cys-201 is estimated to be intrinsically less electrophilic than  
262 Cys-379 ( $s^+ = 0.317$  versus 0.895 atomic units). These results support the proposed attack of the sulfide  
263 anion on the  $S_{\gamma}$  atom of Cys-379 as the first step in the catalytic mechanism (Fig. 1). In the trisulfide  
264 structure (Fig. 8A, *left*) the sulfur atom of Cys-379 is located in a small cavity and is solvent exposed (Fig.  
265 S2, *left*). The sulfane sulfur in the trisulfide points inward, sits at the apex of a  $109^\circ$  S-S-S angle, and is  
266 almost equidistant from the C4a atom in FAD as the  $S_{\gamma}$  of Cys-201. The 4.9 Å (sulfane sulfur) and 4.2 Å  
267 ( $S_{\gamma}$  of Cys-201) distances to C4a in FAD in the representative structure from the most populated cluster in  
268 solution (Fig. 8A, *left*), are comparable to the 4.3 and 3.3 Å distances observed in the trisulfide-containing  
269 crystal structure of SQR-CoQ<sub>1</sub> + sulfide (22). Inspection of the distribution of values for  $S_{C201}$ -C4a<sub>FAD</sub> and  
270 for the sulfane sulfur-C4a<sub>FAD</sub> distances along the simulation (Fig. 8B, *left*) reveal broader histograms  
271 compared to the disulfide ones and a 0.5 Å difference between the maxima.

272 The atomic charges calculated for the sulfur atoms in Cys-201, Cys-379 and the sulfane sulfur in the  
273 trisulfide, reveal a slightly electropositive reaction zone, particularly over Cys-379 (+0.112 atomic units  
274 Table S1), favoring attack of the negatively charged sulfide anion. On the other hand, the local softness for  
275 gaining electron density reveals that the  $S_{\gamma}$  of Cys-379 and the sulfane sulfur are similar and significantly  
276 more reactive than the  $S_{\gamma}$  of Cys-201.

277 *Density Functional Theory (DFT) in a Polarized Continuum Model (PCM) characterization of the*  
278 *sulfide addition step*—To gain further insights into the specific reactivities of the electrophilic sulfurs in a  
279 disulfide (Cys-201) versus a trisulfide (Cys-379) cofactor, we modeled the detailed mechanism using a  
280 DFT/PCM level of theory as described under Experimental Procedures. The  $S_N2$  mechanism involved the  
281 attack of a sulfide anion on the trisulfide or a hypothetical disulfide, with a persulfide or a thiolate anion,  
282 respectively serving as the leaving group (Fig. 8C). The transition states are quasi-linear, late, and quite  
283 synchronic, both in terms of heavy atom reorganization (HAR) and CT complex, with HAR/CT complex  
284 being more advanced in the disulfide compared to the trisulfide, as evidenced by the Wiberg Bond indices  
285 (WBI) and natural population analysis (NPA) charges (Tables S2-S5). The computed free energy barriers  
286 for the reaction of sulfide anion with the trisulfide versus disulfide cofactor in SQR are 9.0 and 15.3 kcal  
287 mol<sup>-1</sup> at 25 °C and 1 atm, respectively. These results provide strong supporting evidence for the  
288 significantly greater reactivity of the trisulfide over the disulfide, accounting for much of the 10<sup>7</sup>-fold  
289 difference in the second order rate constant for the reaction of sulfide anion with SQR versus with a disulfide  
290 in solution [23]. The structure of the resulting CT product complex (Fig. S4) confirms completion of the  
291  $S_N2$  reaction, and that the persulfide (or thiolate) can proceed to the next step in the reaction mechanism,  
292 concentrating excess negative charge at the <sup>201</sup>Cys-SS<sup>-</sup> or (<sup>379</sup>Cys-S<sup>-</sup>).

293

## 294 Discussion

295

296 Members of the flavoprotein disulfide reductase superfamily have a signature two redox cofactor active  
297 site constellation. While the flavin is common to all members, the second cofactor can be a cysteine  
298 disulfide, which is the most common theme in the superfamily, a cysteine sulfenic acid, or a mixed disulfide  
299 (e.g. Cys-S-S-CoA) (13). Recently, a fourth variation on the redox active cysteine cofactor theme, i.e., a  
300 trisulfide, was discovered in human SQR (22,23).

301 Examples of cysteine trisulfides in proteins are rare. They have been observed primarily as artifacts in  
302 recombinant human growth hormone preparations (29-32). Trisulfide intermediates have been postulated  
303 as catalytic intermediates in dissimilatory sulfite reduction in bacteria (33) and in the SQR-catalyzed  
304 polysulfide formation in *Aquifex aeolicus* (18). The role of the cysteine trisulfide in human SQR is  
305 controversial (22,23). Initially, it was proposed to result from a dead-end reaction with sulfide under  
306 anaerobic conditions in the absence of a sulfur acceptor (14). In this model, the active site cysteine disulfide  
307 in SQR would be regenerated via a chemically unusual mechanism that necessitates the elimination of  $S_{\gamma}$   
308 of Cys-379 as an oxidized product, and replaces it with the sulfur atom derived from the trisulfide bridge  
309 (22). In addition to the unusual chemistry, the mechanism would require a significant conformational  
310 change to shorten the ~3.5 Å distance between the  $S_{\gamma}$  of Cys-379 and Cys-201 to allow formation of a

311 cysteine disulfide. Recent biochemical data from our laboratory have however, indicated that the trisulfide  
312 in SQR likely represents the active form of the enzyme (23). In this study, we disassembled and then  
313 reassembled the active site trisulfide by cyanolysis followed by sulfuration, and demonstrated that these  
314 processes led to the restoration of SQR activity.

315 The presence of the cysteine trisulfide in SQR was previously confirmed biochemically via cold  
316 cyanolysis (23), which extracts the bridging sulfur as thiocyanate (34). During the cyanolysis reaction, we  
317 had observed a rapid color change from yellow to blue, followed by a slow reversion to yellow, indicating  
318 the transient formation of a cyanide-induced CT complex followed by its decay. In the current study, this  
319 mechanism was supported by spectral and kinetic analyses, which demonstrate that cyanide, acting as a  
320 nucleophile, adds into the cysteine trisulfide (Fig. 2). We propose that cyanide attacks at the solvent-  
321 accessible Cys-379, forming a  $^{379}\text{Cys-S-C}\equiv\text{N}$  organic thiocyanate and a  $^{201}\text{Cys-SS}^-$  persulfide-to-FAD CT  
322 complex (Fig. 9, 2). The intense CT complex is similar to those seen with alternative nucleophiles such as  
323 sulfite or methanethiol adding to human SQR (24,28) and also resembles the CT complex induced by  
324 coenzyme A persulfide in short-chain acyl-CoA dehydrogenase (23). The off-rate constant ( $k_{\text{off}} = 3.7 \pm 0.6$   
325  $\text{s}^{-1}$  at 4 °C) indicates that cyanide-induced CT complex formation is reversible, and that cyanide dissociation  
326 regenerates the trisulfide. Notably, cyanide can also act as a sulfur acceptor in the SQR reaction forming  
327 thiocyanate (14), and can thus contribute to the sulfide-mediated FAD reduction when both sulfide and  
328 cyanide are present. The ability of cyanide treated SQR to support catalysis indicated that the oxidation  
329 status of the active site cysteines was preserved in cyanolyzed enzyme.

330 The crystal structure of SQR provided a clue as to how the redox state of the cysteines is maintained  
331 upon cyanide treatment by revealing a bridging  $^{379}\text{Cys N-(}^{201}\text{Cys-disulfanyl)-methanimido}$  thioate  
332 intermediate (Fig. 7). We propose that this intermediate is formed by attack of the  $^{201}\text{Cys-SS}^-$  persulfide on  
333 the  $^{379}\text{Cys-S-C}\equiv\text{N}$  thiocyanate (Fig. 9, 3). While the bridging *N*-(disulfanyl)-methanimido thioate  
334 intermediate is stabilized *in crystallo*, it is susceptible to attack by a second equivalent of cyanide (Fig. 9,  
335 4), leading to thiocyanate elimination, which was detected by the cold cyanolysis reaction. The resulting  
336  $^{201}\text{Cys-S-N=CH-S-}^{379}\text{Cys}$  intermediate (Fig. 9, 5) preserves the redox state of the active site cysteines. It  
337 does not however, support generation of a sulfite-induced CT complex (Fig. 3C), or FAD reduction in the  
338 presence of dithiols (Fig. 6 C, D), and it destabilizes SQR (Fig. 5). The absorption spectrum of FAD in the  
339 presence of this intermediate is subtly different from that in the native enzyme with the 450 nm peak blue  
340 shifted to 447 nm, and the 380 nm peak being better resolved.

341 We propose that the trisulfide is rebuilt by the nucleophilic attack of sulfide on the S $\gamma$  of Cys-201,  
342 leading to a CT complex and then, to the resting enzyme (Fig. 9, 5 $\rightarrow$ 2 $\rightarrow$ 1). We attribute the lag phase that  
343 was seen by stopped flow spectroscopy when sulfide was mixed with cyanide treated versus untreated SQR,  
344 to the time needed to rebuild the active enzyme trisulfide (Fig. 4A, B). Once rebuilt, the enzyme cycles  
345 through multiple catalytic turnovers and a difference in specific activities was not seen in cyanide treated  
346 versus untreated SQR under steady-state assay conditions.

347 The difference in the active site configurations of untreated versus cyanide treated SQR was further  
348 demonstrated by their differential reactivity to the dithiols DTT and DHLA. Both dithiols can substitute for  
349 sulfide in the oxidative half reaction, transferring electrons to FAD to form FADH<sub>2</sub> (Fig. 6). Neither DTT  
350 nor DHLA reduced FAD in cyanide pretreated SQR, supporting the proposed mechanism (Fig. 6B).

351 Computational QM/MM and QM modeling provide strong evidence for the catalytic relevance of the  
352 trisulfide versus the disulfide form of the cofactor in SQR (Fig. 8). Based on accessibility, electrostatics  
353 and local softness considerations, the combination of MD simulations and QM/MM modeling predicted  
354 that Cys-379 in the trisulfide is the electrophilic target in the first step of SQR mechanism. Based on  
355 DFT/PCM modeling of the first step in the reaction mechanism, i.e. the attack by a sulfide anion, it was  
356 estimated that the trisulfide configuration affords an  $\sim 10^5$ -fold rate enhancement over a disulfide cofactor  
357 in the active site of SQR.

358 A significant question raised by the discovery of the trisulfide in SQR is how is the cofactor built?  
359 Minimally, one of two mechanisms can be considered. In the first, both cysteines are oxidized (e.g. to a  
360 sulfenic acid) followed by the attack of a sulfide anion to form a persulfide (e.g. on the solvent accessible  
361 Cys-379), setting up trisulfide formation. In the second mechanism, both cysteines are persulfidated, an

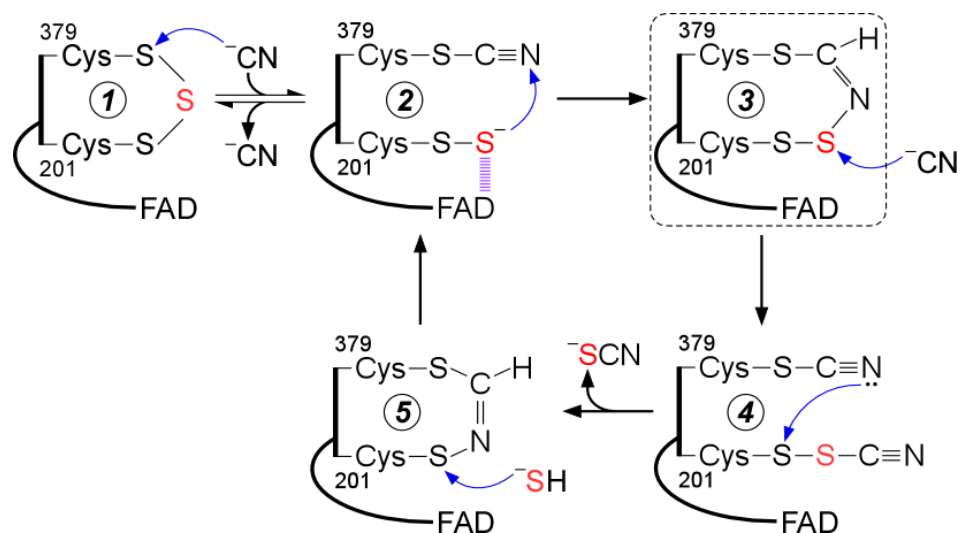

**Figure 9. Proposed mechanism for cyanolysis and cysteine trisulfide rebuilding in SQR.** Cyanide adds into the resting cysteine trisulfide (1) to generate a  $^{379}\text{Cys-S-CN}$  organic thiocyanate while the bridging sulfur is retained in the  $^{201}\text{Cys-SS}^-$  persulfide that participates in a CT complex with FAD (2). Conversion to the  $^{379}\text{Cys N-(}^{201}\text{Cys-disulfanyl)-methanimido thioate}$  intermediate (3) leads to loss of the CT complex. Addition by a second cyanide at the sulfane sulfur of Cys-201 leads to intermediate (4), which can cyclize and eliminate thiocyanate (5), completing the cyanolysis reaction. Addition of sulfide to the  $\text{S}_\gamma$  of Cys-201 in the  $^{379}\text{Cys N-(}^{201}\text{Cys-sulfanyl)-methanimido thioate}$  intermediate (5) regenerates the CT complex (2). Elimination of cyanide regenerates the resting trisulfide form of the enzyme. The bridging sulfur of the cysteine trisulfide is labeled in red. The dashed box highlights the intermediate observed in the crystal structure.

oxidative cysteine modification that has been detected in many proteins (35). Low molecular weight persulfides (e.g. cysteine persulfide) could lead to formation of the bis-persulfide form of SQR from which the trisulfide could be built. Low molecular weight persulfides can be synthesized by all three  $\text{H}_2\text{S}$  generating enzymes (6,7,36,37), and a potential role for these reactive sulfur species in signaling has been suggested (38). Alternatively, generation of the trisulfide could be catalyzed; candidate human sulfur transferases include rhodanese (39), mercaptopyruvate sulfurtransferase (6) and TSTD1 (40).

In summary, we have demonstrated that the cysteine trisulfide in human SQR can be reversibly dismantled and reassembled. The trisulfide not only contributes to a significant rate enhancement over a disulfide for the nucleophilic addition of sulfide, but also stabilizes the enzyme. Studies are underway in our laboratory to investigate whether assembly of the trisulfide is enzyme catalyzed.

## Materials and Methods

**Materials**—The following reagents were purchased from Millipore Sigma:  $\text{CoQ}_1$ , n-dodecyl- $\beta$ -D-maltoside (DDM), potassium cyanide, sodium sulfide nonahydrate, and sodium sulfite. The phospholipids, DHPC (1,2-diheptanoyl-*sn*-glycero-3-phosphocholine) and POPC, were purchased from Avanti Polar Lipids (Alabaster, AL). DHLA was purchased from Cayman Chemical Company (Ann Arbor, MI).

**Preparation of human SQR**—Human SQR was purified as detergent-solubilized recombinant enzyme as described previously (15). Human SQR used for crystallization was purified in an identical procedure as described previously (15), except that DHPC (0.03% w/v) was substituted with DDM (0.05% w/v) as the solubilizing detergent (23).

**SQR spectral analyses and activity assays**—The absorption spectra of SQR were recorded on a temperature-controlled Shimadzu UV-2600 spectrophotometer in Buffer A (50 mM Tris, pH 8.0, containing 300 mM NaCl and 0.03% DHPC). The concentration of SQR used in the spectral assays was estimated by the absorbance of the FAD cofactor, using an extinction coefficient of  $11,500 \text{ M}^{-1} \text{ cm}^{-1}$  at 450 nm (14). SQR activity was estimated by the rate of  $\text{CoQ}_1$  reduction ( $\Delta\varepsilon_{\text{ox-red}} = 12,000 \text{ M}^{-1} \text{ cm}^{-1}$ ) at 25 °C as described previously (15), using sulfite (800  $\mu\text{M}$ ) as the sulfur acceptor.

400 *Stopped flow spectroscopy*—All stopped flow experiments were conducted at 4 °C on a SF-DX2 double  
401 mixing stopped-flow system from Hi-Tech Scientific, equipped with a photodiode array detector (300-700  
402 nm range). The concentrations reported in the figure legends for stopped flow experiments are before 1:1  
403 (v/v) mixing.

404 *Detection of sulfane sulfur in SQR*—SQR was assayed for sulfane sulfur using the cold cyanolysis  
405 method as described previously (23). The data for mol sulfane sulfur per mol SQR monomer are presented  
406 as the mean  $\pm$  SD of three independent preparations of SQR.

407 *Crystallization of SQR-CoQ<sub>1</sub> with cyanide*—SQR-CoQ<sub>1</sub> crystals were grown at 20 °C by the hanging  
408 drop vapor diffusion method using solubilized human SQR (17.4 mg mL<sup>-1</sup>) in 50 mM Tris-HCl pH 8.0,  
409 containing NaCl (300 mM) and n-dodecyl  $\beta$ -D-maltoside (0.05% w/v) supplemented with CoQ<sub>1</sub> (5 mM, in  
410 100% DMSO). The SQR solution was then mixed 1:1 (v/v) with the reservoir solution composed of 200  
411 mM ammonium tartrate dibasic, pH 6.6, and PEG 3350 (20% w/v), yielding a final CoQ<sub>1</sub> concentration of  
412 2.5 mM. The resulting SQR-CoQ<sub>1</sub> crystals were soaked with potassium cyanide (1.25 mM) for 40 min,  
413 followed by cryoprotection in the aforementioned reservoir solution supplemented with glycerol (35% v/v)  
414 before freezing in liquid nitrogen.

415 *Thermal denaturation assays*—The thermal stabilities of untreated SQR, and cyanide pre-treated SQR  
416 before and after sulfide treatment, were assessed using 300  $\mu$ L of enzyme (5  $\mu$ M) in a quartz cuvette, housed  
417 in a temperature-controlled Shimadzu UV-2600 spectrophotometer. SQR was allowed to equilibrate at 20  
418 °C for 2 min before initiating the assay by increasing the temperature by 1 °C min<sup>-1</sup>. Thermal denaturation  
419 was monitored by the increase in absorbance at 600 nm.

420 *X-ray data collection and structure determination*—Diffraction data for SQR-CoQ<sub>1</sub> + cyanide crystal  
421 was collected at the LS-CAT beamline 21-ID-D (Advanced Photon Source, Argonne National Laboratory)  
422 at 1.12723 Å wavelength. The diffraction images were processed using HKL2000 (41). The molecular  
423 replacement solution for SQR-CoQ<sub>1</sub> + cyanide was determined using SQR-CoQ<sub>1</sub> (PDB ID: 6OIB) as a  
424 search model. The final structures were completed using alternate cycles of manual fitting in Coot (42) and  
425 refinement in REFMAC5 (43). The stereochemical quality of the final models was assessed using  
426 MolProbity (44).

427 *MD simulations of SQR*—The crystal structure of human SQR-CoQ<sub>1</sub> + sulfide in the trisulfide state  
428 complexed with FAD (PDB: 6O16, monomer A, 2.56 Å resolution) was used as a starting point (23). CoQ<sub>1</sub>  
429 was manually docked by superimposing another structure of SQR-CoQ<sub>1</sub> (PDB: 6OIB, monomer A, 2.03 Å  
430 resolution). Two systems were simulated: SQR in a Cys-201-Cys-379 disulfide state (SQR-SS) and in the  
431 trisulfide state (SQR-SSS). Protonation and tautomers of titratable residues, and missing hydrogen atoms,  
432 were added with the ProToss utility (45). Systems were solvated with a periodic truncated octahedral box  
433 of TIP3P water extended up to 12 Å around solute, then neutralized with six Cl<sup>-</sup> ions with the *leap* utility  
434 of AmberTools17 (46). Both were then minimized, heated to 310 K (500 ps, NVT), and equilibrated at 1  
435 atm (1 ns, NPT) prior to conducting the simulations (600 ns, NPT). Minimization and simulation was  
436 carried out using the *pmemd.cuda* module of AMBER 16 (46). For describing the protein, the AMBER  
437 *ff14SB* force field was used for standard residues, whereas the *gaff* force field was used for FAD and CoQ<sub>1</sub>  
438 ligands, along with RESP charges (47). The central sulfur atom of the trisulfide moiety was treated as a  
439 separate residue with zero charge. All parameters for describing the trisulfide moiety were present in the  
440 *ff14SB* force field, except for the S-S-S bonds, which were taken from the *gaff* force field. An 8.0 Å cutoff  
441 was used for treating direct non-bonding interactions, and long-range interactions were treated with the  
442 *Particle Mesh Ewald* (PME) method (48). For MD simulations, temperature and pressure (in NPT  
443 simulations) were controlled by means of the Langevin thermostat (49) and the Monte Carlo barostat (50),  
444 respectively. Distances involving hydrogen atoms were constrained with SHAKE (51) and a time  
445 integration step of 2 femtoseconds was used. Harmonic restraints of 10 kcal mol<sup>-1</sup> Å<sup>-2</sup> were applied to a  
446 water-bridged hydrogen bond observed in SQR crystal structures (23) between the protonated amino group  
447 of the Lys-207 side chain and the N5 atom in FAD. Trajectory processing and analysis was done with the  
448 *cpptraj* module of AmberTools17 (46). Convergence of simulations was monitored following the Ca-  
449 RMSD (see Fig. S1). In order to extract representative structures from the MD 600 ns trajectories, clustering

450 analysis (5 clusters) was performed for each system, using a hierarchical-agglomerative algorithm with  
451 *cpptraj* (46).

452 *Reactivity descriptors from QM/MM calculations on SQR*—Descriptors of intrinsic reactivity derived  
453 from the electronic structure of Cys-379 and Cys-201 were calculated at the QM/MM level in the  
454 framework of a conceptual DFT (52) at the M06-2X-D3/6-31+G(d,p) level of theory (53-55) combined to  
455 a classical description of the enzyme using the aforementioned force fields. Global softness ( $S$ ) and  
456 electrophilic Fukui function condensed to the  $S_{\gamma}$  atom ( $f_{S_{\gamma}}^{+}$ ) were calculated according to equations (1) and  
457 (2):

$$S = \frac{1}{IP - EA} \quad (1)$$

458 where  $IP$  and  $EA$  respectively represent the ionization potential and electron affinity of the system of  
459 interest, determined using the vertical  $\Delta$ SCF (self-consistent field) approximation (56), and  
460

$$f_{S_{\gamma}}^{+} = q_{S_{\gamma}}(N) - q_{S_{\gamma}}(N + 1) \quad (2)$$

461  
462 where  $q_{S_{\gamma}}(N)$  and  $q_{S_{\gamma}}(N+1)$  represent the atomic charge on the  $S_{\gamma}$  atoms of Cys-379/Cys-201, calculated  
463 using a Natural Population Analysis (57), both in the system of reference bearing  $N$  electrons and after  
464 addition of one extra electron. The atomic electrophilic softness ( $s_{S_{\gamma}}^{+}$ , calculated as  $S$  times  $f_{S_{\gamma}}^{+}$ ) is a local  
465 descriptor that can be used to compare  $S_{\gamma}$  intrinsic reactivity in Cys-379 and Cys-201 across SQR-SS and  
466 SQR-SSS. The electronic structure of each macromolecular system was thus obtained through *single-point*  
467 calculations performed on representative structures extracted from MD simulations using the additive  
468 QM/MM scheme implemented in AMBER16 (46) interfaced with Gaussian 09 Rev. D.01 (58) with a QM  
469 region comprising  $^{379}\text{Cys-CH}_2\text{-S(S)S-CH}_2\text{-}^{201}\text{Cys}$ .

471 *DFT-PCM modeling of reaction mechanisms and barriers for sulfide nucleophilic attack*— The  
472 mechanism of the reaction of the sulfide anion, manually docked and oriented as guided by our previous  
473 models of similar reactions (59), was characterized at the M06-2X-D3/6-31+G(d,p)-PCM level of theory,  
474 previously validated by us to model reactions of the sulfide anion in a similar system (59). A simplified  
475 representation of the catalytic disulfide/trisulfide and FAD at the active site of SQR was used including  
476  $\text{CH}_3\text{SSSCH}_3/\text{CH}_3\text{SSCH}_3$  and the flavin. The structures of each reactant complex, transition and product  
477 complex were fully optimized and verified by the inspection of the eigenvalues of the Hessian matrix at the  
478 same level. Thermochemical corrections at 298 K and 1 atm were calculated under usual approximations  
479 of statistical thermodynamics (rigid rotor, harmonic frequencies) as implemented in Gaussian 09 Rev. D01  
480 (58). The effects exerted by the bulk protein on the active site structure along the reaction and reaction  
481 barrier were introduced using the IEF-PCM continuum model (60) with a dielectric constant  $\epsilon = 10.125$ .  
482 The reactive systems were placed in a molecular shaped cavity constructed using Bondi's radii (61) and  
483 including non-electrostatic (cavitation, repulsion and dispersion) contributions. In order to connect  
484 transition states with reactant complexes and product complexes, we calculated the IRC reaction path (62)  
485 using the HPC algorithm (63).

## 486 487 **Acknowledgements**

488 We thank Drs. David P. Ballou and Markus Ruetz for insightful discussions on the cysteine trisulfide  
489 cyanolysis and rebuilding mechanisms. MD simulations were carried out using Uruguayan supercomputer  
490 resources from ClusterUY (<https://cluster.uy>). Continuous support from PEDECIBA-Uruguay is gratefully  
491 acknowledged by JB and ELC who are active members of the Uruguayan National Research System (SNI-  
492 ANII).

## 493 494 **Author Disclosure Statement**

495 No competing financial interest exists.

496

497 **Author contributions**

498 A.P.L. designed and performed the kinetic and spectroscopic experiments. S.M. determined the crystal  
499 structure, which was analyzed together with U.S.C. J.B. performed the computational modeling and MD  
500 simulations, which were analyzed together with E.L.C. R.B. helped conceive the experiments, analyzed the  
501 data and co-wrote the manuscript with A.P.L. and S.M. with the exception of the computational sections  
502 that were co-written by J.B. and E.L.C. All authors approved the final version of the manuscript.



503 **References**

- 504
- 505 1. Kimura, H. (2010) Hydrogen sulfide: from brain to gut. *Antioxid Redox Signal* **12**, 1111–1123
  - 506 2. Kabil, O., and Banerjee, R. (2010) Redox biochemistry of hydrogen sulfide. *J Biol Chem* **285**,
  - 507 21903–21907
  - 508 3. Filipovic, M. R., Zivanovic, J., Alvarez, B., and Banerjee, R. (2018) Chemical Biology of H<sub>2</sub>S
  - 509 Signaling through Persulfidation. *Chem Rev* **118**, 1253–1337
  - 510 4. Singh, S., and Banerjee, R. (2011) PLP-dependent H(2)S biogenesis. *Biochim Biophys Acta* **1814**,
  - 511 1518-1527
  - 512 5. Chiku, T., Padovani, D., Zhu, W., Singh, S., Vitvitsky, V., and Banerjee, R. (2009) H<sub>2</sub>S biogenesis
  - 513 by human cystathionine gamma-lyase leads to the novel sulfur metabolites lanthionine and
  - 514 homolanthionine and is responsive to the grade of hyperhomocysteinemia. *J Biol Chem* **284**,
  - 515 11601–11612
  - 516 6. Yadav, P. K., Yamada, K., Chiku, T., Koutmos, M., and Banerjee, R. (2013) Structure and kinetic
  - 517 analysis of H<sub>2</sub>S production by human mercaptopyruvate sulfurtransferase. *J Biol Chem* **288**,
  - 518 20002–20013
  - 519 7. Yadav, P. K., Vitvitsky, V., Carballal, S., Seravalli, J., and Banerjee, R. (2020) Thioredoxin
  - 520 regulates human mercaptopyruvate sulfurtransferase at physiologically-relevant concentrations. *J*
  - 521 *Biol Chem* **295**, 6299-6311
  - 522 8. Furne, J., Saeed, A., and Levitt, M. D. (2008) Whole tissue hydrogen sulfide concentrations are
  - 523 orders of magnitude lower than presently accepted values. *Am J Physiol Regul Integr Comp Physiol*
  - 524 **295**, R1479–1485
  - 525 9. Levitt, M. D., Abdel-Rehim, M. S., and Furne, J. (2011) Free and acid-labile hydrogen sulfide
  - 526 concentrations in mouse tissues: anomalously high free hydrogen sulfide in aortic tissue. *Antioxid*
  - 527 *Redox Signal* **15**, 373-378
  - 528 10. Vitvitsky, V., Kabil, O., and Banerjee, R. (2012) High turnover rates for hydrogen sulfide allow
  - 529 for rapid regulation of its tissue concentrations. *Antioxid Redox Signal* **17**, 22–31
  - 530 11. Bouillaud, F., and Blachier, F. (2011) Mitochondria and sulfide: a very old story of poisoning,
  - 531 feeding, and signaling? *Antioxid Redox Signal* **15**, 379-391
  - 532 12. Hildebrandt, T. M., and Grieshaber, M. K. (2008) Three enzymatic activities catalyze the oxidation
  - 533 of sulfide to thiosulfate in mammalian and invertebrate mitochondria. *FEBS J* **275**, 3352–3361
  - 534 13. Argyrou, A., and Blanchard, J. S. (2004) Flavoprotein disulfide reductases: advances in chemistry
  - 535 and function. *Prog Nucleic Acid Res Mol Biol* **78**, 89–142
  - 536 14. Jackson, M. R., Melideo, S. L., and Jorns, M. S. (2012) Human sulfide:quinone oxidoreductase
  - 537 catalyzes the first step in hydrogen sulfide metabolism and produces a sulfane sulfur metabolite.
  - 538 *Biochemistry* **51**, 6804–6815
  - 539 15. Libiad, M., Yadav, P. K., Vitvitsky, V., Martinov, M., and Banerjee, R. (2014) Organization of the
  - 540 human mitochondrial hydrogen sulfide oxidation pathway. *J Biol Chem* **289**, 30901–30910
  - 541 16. Landry, A. P., Ballou, D. P., and Banerjee, R. (2017) H<sub>2</sub>S oxidation by nanodisc-embedded human
  - 542 sulfide quinone oxidoreductase. *J Biol Chem* **292**, 11641–11649
  - 543 17. Friederich, M. W., Elias, A. F., Kuster, A., Laugwitz, L., Larson, A. A., Landry, A. P., Ellwood-
  - 544 Digel, L., Mirsky, D. M., Dimmock, D., and Haven, J. (2020) Pathogenic variants in SQOR
  - 545 encoding sulfide: quinone oxidoreductase are a potentially treatable cause of Leigh disease. *J*
  - 546 *Inherited Metab Dis*, 10.1002/jimd.12232
  - 547 18. Marcia, M., Ermler, U., Peng, G., and Michel, H. (2009) The structure of Aquifex aeolicus
  - 548 sulfide:quinone oxidoreductase, a basis to understand sulfide detoxification and respiration. *Proc*
  - 549 *Natl Acad Sci U S A* **106**, 9625–9630
  - 550 19. Brito, J. A., Sousa, F. L., Stelter, M., Bandejas, T. M., Vonrhein, C., Teixeira, M., Pereira, M. M.,
  - 551 and Archer, M. (2009) Structural and functional insights into sulfide:quinone oxidoreductase.
  - 552 *Biochemistry* **48**, 5613–5622

- 553 20. Cherney, M. M., Zhang, Y., Solomonson, M., Weiner, J. H., and James, M. N. (2010) Crystal  
554 structure of sulfide:quinone oxidoreductase from *Acidithiobacillus ferrooxidans*: insights into  
555 sulfidotrophic respiration and detoxification. *J Mol Biol* **398**, 292–305
- 556 21. Chen, Z. W., Koh, M., Van Driessche, G., Van Beeumen, J. J., Bartsch, R. G., Meyer, T. E.,  
557 Cusanovich, M. A., and Mathews, F. S. (1994) The structure of flavocytochrome c sulfide  
558 dehydrogenase from a purple phototrophic bacterium. *Science* **266**, 430-432
- 559 22. Jackson, M. R., Loll, P. J., and Jorns, M. S. (2019) X-Ray Structure of Human Sulfide:Quinone  
560 Oxidoreductase: Insights into the Mechanism of Mitochondrial Hydrogen Sulfide Oxidation.  
561 *Structure* **27**, 794-805 e794
- 562 23. Landry, A. P., Moon, S., Kim, H., Yadav, P. K., Guha, A., Cho, U. S., and Banerjee, R. (2019) A  
563 Catalytic Trisulfide in Human Sulfide Quinone Oxidoreductase Catalyzes Coenzyme A Persulfide  
564 Synthesis and Inhibits Butyrate Oxidation. *Cell Chem Biol* **26**, 1515-1525 e1514
- 565 24. Mishanina, T. V., Yadav, P. K., Ballou, D. P., and Banerjee, R. (2015) Transient Kinetic Analysis  
566 of Hydrogen Sulfide Oxidation Catalyzed by Human Sulfide Quinone Oxidoreductase. *J Biol Chem*  
567 **290**, 25072–25080
- 568 25. Gubern, M., Andriamihaja, M., Nubel, T., Blachier, F., and Bouillaud, F. (2007) Sulfide, the first  
569 inorganic substrate for human cells. *FASEB J* **21**, 1699–1706
- 570 26. Benchoam, D., Cuevasanta, E., Moller, M. N., and Alvarez, B. (2020) Persulfides, at the crossroads  
571 between hydrogen sulfide and thiols. *Essays Biochem* **64**, 155-168
- 572 27. Cuevasanta, E., Lange, M., Bonanata, J., Coitino, E. L., Ferrer-Sueta, G., Filipovic, M. R., and  
573 Alvarez, B. (2015) Reaction of Hydrogen Sulfide with Disulfide and Sulfenic Acid to Form the  
574 Strongly Nucleophilic Persulfide. *J Biol Chem* **290**, 26866–26880
- 575 28. Landry, A. P., Ballou, D. P., and Banerjee, R. (2018) Modulation of Catalytic Promiscuity during  
576 Hydrogen Sulfide Oxidation. *ACS Chem Biol* **13**, 1651-1658
- 577 29. Jespersen, A. M., Christensen, T., Klausen, N. K., Nielsen, F., and Sorensen, H. H. (1994)  
578 Characterisation of a trisulphide derivative of biosynthetic human growth hormone produced in  
579 *Escherichia coli*. *Eur J Biochem* **219**, 365-373
- 580 30. Thomsen, M. K., Hansen, B. S., Nilsson, P., Nowak, J., Johansen, P. B., Thomsen, P. D., and  
581 Christiansen, J. (1994) Pharmacological characterization of a biosynthetic trisulfide-containing  
582 hydrophobic derivative of human growth hormone: comparison with standard 22 K growth  
583 hormone. *Pharmacol Toxicol* **74**, 351-358
- 584 31. Andersson, C., Edlund, P. O., Gellerfors, P., Hansson, Y., Holmberg, E., Hult, C., Johansson, S.,  
585 Kordel, J., Lundin, R., Mendel-Hartvig, I. B., Noren, B., Wehler, T., Widmalm, G., and Ohman, J.  
586 (1996) Isolation and characterization of a trisulfide variant of recombinant human growth hormone  
587 formed during expression in *Escherichia coli*. *Int J Pept Protein Res* **47**, 311-321
- 588 32. Canova-Davis, E., Baldonado, I. P., Chloupek, R. C., Ling, V. T., Gehant, R., Olson, K., and  
589 Gillece-Castro, B. L. (1996) Confirmation by mass spectrometry of a trisulfide variant in methionyl  
590 human growth hormone biosynthesized in *Escherichia coli*. *Anal Chem* **68**, 4044-4051
- 591 33. Santos, A. A., Venceslau, S. S., Grein, F., Leavitt, W. D., Dahl, C., Johnston, D. T., and Pereira, I.  
592 A. (2015) A protein trisulfide couples dissimilatory sulfate reduction to energy conservation.  
593 *Science* **350**, 1541-1545
- 594 34. Wood, J. L. (1987) Sulfane sulfur. *Methods Enzymol* **143**, 25-29
- 595 35. Gao, X. H., Krokowski, D., Guan, B. J., Bederman, I., Majumder, M., Parisien, M., Diatchenko,  
596 L., Kabil, O., Willard, B., Banerjee, R., Wang, B., Bebek, G., Evans, C. R., Fox, P. L., Gerson, S.  
597 L., Hoppel, C. L., Liu, M., Arvan, P., and Hatzoglou, M. (2015) Quantitative H<sub>2</sub>S-mediated protein  
598 sulfhydration reveals metabolic reprogramming during the integrated stress response. *Elife* **4**,  
599 e10067
- 600 36. Ida, T., Sawa, T., Ihara, H., Tsuchiya, Y., Watanabe, Y., Kumagai, Y., Suematsu, M., Motohashi,  
601 H., Fujii, S., Matsunaga, T., Yamamoto, M., Ono, K., Devarie-Baez, N. O., Xian, M., Fukuto, J.  
602 M., and Akaike, T. (2014) Reactive cysteine persulfides and S-polythiolation regulate oxidative  
603 stress and redox signaling. *Proc Natl Acad Sci U S A* **111**, 7606-7611

- 604 37. Yadav, P. K., Martinov, M., Vitvitsky, V., Seravalli, J., Wedmann, R., Filipovic, M. R., and  
605 Banerjee, R. (2016) Biosynthesis and Reactivity of Cysteine Persulfides in Signaling. *J Am Chem*  
606 *Soc* **138**, 289-299
- 607 38. Mishanina, T. V., Libiad, M., and Banerjee, R. (2015) Biogenesis of reactive sulfur species for  
608 signaling by hydrogen sulfide oxidation pathways. *Nat Chem Biol* **11**, 457–464
- 609 39. Libiad, M., Sriraman, A., and Banerjee, R. (2015) Polymorphic Variants of Human Rhodanese  
610 Exhibit Differences in Thermal Stability and Sulfur Transfer Kinetics. *J Biol Chem* **290**, 23579-  
611 23588
- 612 40. Libiad, M., Motl, N., Akey, D. L., Sakamoto, N., Fearon, E. R., Smith, J. L., and Banerjee, R.  
613 (2018) Thiosulfate sulfurtransferase-like domain-containing 1 protein interacts with thioredoxin. *J*  
614 *Biol Chem* **293**, 2675–2686
- 615 41. Otwinowski, Z., and Minor, W. (1997) Processing of X-ray diffraction data collected in oscillation  
616 mode. *Methods Enzymol* **276**, 307-326
- 617 42. Emsley, P., and Cowtan, K. (2004) Coot: model-building tools for molecular graphics. *Acta*  
618 *Crystallogr D Biol Crystallogr* **60**, 2126-2132
- 619 43. Murshudov, G. N., Vagin, A. A., and Dodson, E. J. (1997) Refinement of macromolecular  
620 structures by the maximum-likelihood method. *Acta Crystallogr D Biol Crystallogr* **53**, 240-255
- 621 44. Chen, V. B., Arendall, W. B., 3rd, Headd, J. J., Keedy, D. A., Immormino, R. M., Kapral, G. J.,  
622 Murray, L. W., Richardson, J. S., and Richardson, D. C. (2010) MolProbity: all-atom structure  
623 validation for macromolecular crystallography. *Acta Crystallogr D Biol Crystallogr* **66**, 12-21
- 624 45. Bietz, S., Urbaczek, S., Schulz, B., and Rarey, M. (2014) Protoss: a holistic approach to predict  
625 tautomers and protonation states in protein-ligand complexes. *J Cheminform* **6**, 12
- 626 46. Case, D. A., Cerutti, D. S., Cheatham III, T. E., Darden, T. A., Duke, R. E., Giese, T. J., Gohlke,  
627 H., A.W., G., Greene, D., Homeyer, N., Izadi, S., Kovalenko, A., Lee, T. S., LeGrand, S., Li, P.,  
628 Lin, C., Liu, J., Luchko, T., Luo, R., Mermelstein, D., Merz, K. M., Monard, G., Nguyen, H.,  
629 Omelyan, I., Onufriev, A., Pan, F., Qi, R., Roe, D. R., Roitberg, A., Sagui, C., Simmerling, C. L.,  
630 Botello-Smith, W. M., Swails, J., Walker, R. C., Wang, J., Wolf, R. M., Wu, X., Xiao, L., York,  
631 D. M., and Kollman, P. A. (2017) AMBER 2017. University of California, San Francisco.
- 632 47. Bayly, C. I., Cieplak, P., Cornell, W., and Kollman, P. A. (1993) A well-behaved electrostatic  
633 potential based method using charge restraints for deriving atomic charges: the RESP model. *The*  
634 *Journal of Physical Chemistry* **97**, 10269-10280
- 635 48. Essmann, U., Perera, L., Berkowitz, M. L., Darden, T., Lee, H., and Pedersen, L. G. (1995) A  
636 smooth particle mesh Ewald method. *The Journal of Chemical Physics* **103**, 8577-8593
- 637 49. Loncharich, R. J., Brooks, B. R., and Pastor, R. W. (1992) Langevin dynamics of peptides: the  
638 frictional dependence of isomerization rates of N-acetylalanyl-N'-methylamide. *Biopolymers* **32**,  
639 523-535
- 640 50. Åqvist, J., Wennerström, P., Nervall, M., Bjelic, S., and Brandsdal, B. O. (2004) Molecular  
641 dynamics simulations of water and biomolecules with a Monte Carlo constant pressure algorithm.  
642 *Chem Phys Lett* **384**, 288-294
- 643 51. Ryckaert, J.-P., Ciccotti, G., and Berendsen, H. J. C. (1977) Numerical integration of the cartesian  
644 equations of motion of a system with constraints: molecular dynamics of n-alkanes. *Journal of*  
645 *computational physics* **23**, 327-341
- 646 52. Geerlings, P., De Proft, F., and Langenaeker, W. (2003) Conceptual density functional theory.  
647 *Chem Rev* **103**, 1793-1873
- 648 53. Francl, M. M., Pietro, W. J., Hehre, W. J., Binkley, J. S., Gordon, M. S., DeFrees, D. J., and Pople,  
649 J. A. (1982) Self-consistent molecular orbital methods. XXIII. A polarization-type basis set for  
650 second-row elements. *The Journal of Chemical Physics* **77**, 3654-3665
- 651 54. Grimme, S., Antony, J., Ehrlich, S., and Krieg, H. (2010) A consistent and accurate ab initio  
652 parametrization of density functional dispersion correction (DFT-D) for the 94 elements H-Pu. *J*  
653 *Chem Phys* **132**, 154104

- 654 55. Zhao, Y., and Truhlar, D. G. (2008) The M06 suite of density functionals for main group  
655 thermochemistry, thermochemical kinetics, noncovalent interactions, excited states, and transition  
656 elements: two new functionals and systematic testing of four M06-class functionals and 12 other  
657 functionals. *Theor Chem Acc* **120**, 215-241
- 658 56. Jones, R. O., and Gunnarsson, O. (1989) The density functional formalism, its applications and  
659 prospects. *Reviews of Modern Physics* **61**, 689
- 660 57. Foster, a. J. P., and Weinhold, F. (1980) Natural hybrid orbitals. *J Am Chem Soc* **102**, 7211-7218
- 661 58. Frisch, M. J., Trucks, G. W., Schlegel, H. B., Scuseria, G. E., Robb, M. A., Cheeseman, J. R.,  
662 Scalmani, G., Barone, V., Mennucci, B., Petersson, G. A., Nakatsuji, H., Caricato, M., Li, X.,  
663 Hratchian, H. P., Izmaylov, A. F., Bloino, J., Zheng, G., Sonnenberg, J. L., Hada, M., Ehara, M.,  
664 Toyota, K., Fukuda, R., Hasegawa, J., Ishida, M., Nakajima, T., Honda, Y., Kitao, O., Nakai, H.,  
665 Vreven, T., Montgomery Jr., J. A., Peralta, J. E., Ogliaro, F., Bearpark, M. J., Heyd, J., Brothers,  
666 E. N., Kudin, K. N., Staroverov, V. N., Kobayashi, R., Normand, J., Raghavachari, K., Rendell, A.  
667 P., Burant, J. C., Iyengar, S. S., Tomasi, J., Cossi, M., Rega, N., Millam, N. J., Klene, M., Knox, J.  
668 E., Cross, J. B., Bakken, V., Adamo, C., Jaramillo, J., Gomperts, R., Stratmann, R. E., Yazyev, O.,  
669 Austin, A. J., Cammi, R., Pomelli, C., Ochterski, J. W., Martin, R. L., Morokuma, K., Zakrzewski,  
670 V. G., Voth, G. A., Salvador, P., Dannenberg, J. J., Dapprich, S., Daniels, A. D., Farkas, Ö.,  
671 Foresman, J. B., Ortiz, J. V., Cioslowski, J., and Fox, D. J. (2013) Gaussian 09 Revision D.01.  
672 Gaussian, Inc., Wallingford, CT.
- 673 59. Bonanata, J., and Coitino, E. L. (2019) Understanding the mechanism of H<sub>2</sub>S oxidation by flavin-  
674 dependent sulfide oxidases: a DFT/IEF-PCM study. *J Mol Model* **25**, 308
- 675 60. Mennucci, B. (2012) Polarizable continuum model. *Wiley Interdisciplinary Reviews:*  
676 *Computational Molecular Science* **2**, 386-404
- 677 61. Bondi, A. v. (1964) van der Waals volumes and radii. *The Journal of physical chemistry* **68**, 441-  
678 451
- 679 62. Fukui, K. (1981) The path of chemical reactions-the IRC approach. *Acc Chem Res* **14**, 363-368
- 680 63. Hratchian, H. P., and Schlegel, H. B. (2005) Using Hessian updating to increase the efficiency of  
681 a Hessian based predictor-corrector reaction path following method. *J Chem Theory Comput* **1**, 61-  
682 69

683  
684  
685  
686  
687  
688  
689  
690  
691  
692  
693  
694  
695  
696  
697  
698  
699  
700  
701  
702  
703
